# Supplementary material
Source: publisher site journal article supplement (https://www.spandidos-publications.com/7326/downloadSupplementary)
Supplement: Supplementary file 1 [file downloadSupplementary]

## Sheet: Table S8
Table SVIII. Kyoto Encyclopedia of Genes enrichment analysis.
ID	Description	GeneRatio	BgRatio	pvalue	p.adjust	qvalue	geneID	Count
hsa04918	Thyroid hormone synthesis	15/331	75/8292	1.96194e-07	5.59152e-05	4.48148e-05	TG/GPX3/PAX8/TSHR/IYD/HSP90B1/HSPA5/TPO/ATP1A1/SLC26A4/CANX/LRP2/CREB3L2/DUOXA2/PRKACB	15
hsa05166	Human T-cell leukemia virus 1 infection	26/331	222/8292	7.09781e-07	0.000101144	8.10645e-05	CCND1/CANX/CALR/EGR1/MAP3K1/PTTG1/CREB3L2/CCND2/CDC27/SPI1/NFKBIA/HLA-B/CD3G/ZFP36/HLA-DQB1/CD3E/CD3D/ITGAL/ANAPC13/TGFB1/PRKACB/CDKN1A/ATM/CCND3/BAX/FOS	26
hsa05169	Epstein-Barr virus infection	23/331	202/8292	5.13347e-06	0.00048768	0.000390864	CCND1/CALR/ENTPD1/MAPK13/CCND2/RUNX3/CD247/NFKBIA/HLA-B/CD3G/TNFAIP3/HLA-DQB1/CD3E/CD3D/ITGAL/CYCS/BCL2/CDKN1A/CCND3/CD44/CD58/GADD45B/BAX	23
hsa05142	Chagas disease	15/331	102/8292	1.12674e-05	0.000802801	0.000643427	CALR/MAPK13/CD247/NFKBIA/CD3G/CCL3L3/CD3E/C1QC/C1QB/C1QA/CD3D/CCL5/TGFB1/CXCL8/FOS	15
hsa04210	Apoptosis	17/331	136/8292	2.6787e-05	0.00130495	0.00104589	CTSB/CTSH/PTPN13/PARP4/TUBA4A/TUBA1A/NFKBIA/PRF1/TNFSF10/CYCS/BCL2/ATM/GADD45B/PMAIP1/CTSS/BAX/FOS	17
hsa04115	p53 signaling pathway	12/331	73/8292	2.74726e-05	0.00130495	0.00104589	PERP/CCND1/ZMAT3/CCND2/CYCS/BCL2/CDKN1A/ATM/CCND3/GADD45B/PMAIP1/BAX	12
hsa04514	Cell adhesion molecules	18/331	157/8292	5.04682e-05	0.00205478	0.00164686	CLDN7/SDC4/CLDN1/SDC2/CLDN16/PTPRF/SDC1/NRCAM/SELPLG/ICOS/CD8A/TIGIT/HLA-B/HLA-DQB1/CD2/PTPRC/ITGAL/CD58	18
hsa05205	Proteoglycans in cancer	21/331	205/8292	6.5401e-05	0.00232991	0.00186737	FN1/CAV1/SDC4/CCND1/MET/SDC2/VEGFA/CD63/RRAS/ITGA2/ANK3/SDC1/MAPK13/FLNB/PLAU/TGFB1/PRKACB/CDKN1A/PLAUR/CD44/MSN	21
hsa04610	Complement and coagulation cascades	12/331	86/8292	0.000143378	0.00454031	0.00363896	CLU/SERPINA1/PROS1/CD55/CFH/CFI/C1QC/C1QB/C1QA/PLAU/PLAUR/CFD	12
hsa05222	Small cell lung cancer	12/331	92/8292	0.000274513	0.00782362	0.00627045	FN1/CCND1/ITGA3/LAMB3/ITGA2/RXRG/NFKBIA/CYCS/BCL2/CDKN1A/GADD45B/BAX	12
hsa05150	Staphylococcus aureus infection	12/331	96/8292	0.000409679	0.0106144	0.00850722	KRT19/CFH/CFI/SELPLG/FCGR2A/FCGR3A/HLA-DQB1/C1QC/C1QB/C1QA/ITGAL/CFD	12
hsa04640	Hematopoietic cell lineage	12/331	99/8292	0.000544662	0.0123748	0.0099181	CD24/ITGA3/CD55/ITGA2/CD8A/CD3G/HLA-DQB1/CD3E/IL7R/CD2/CD3D/CD44	12
hsa05416	Viral myocarditis	9/331	60/8292	0.000564463	0.0123748	0.0099181	CAV1/CCND1/CD55/DMD/PRF1/HLA-B/HLA-DQB1/ITGAL/CYCS	9
hsa00330	Arginine and proline metabolism	8/331	50/8292	0.00073347	0.0139359	0.0111693	CKB/ARG2/ALDH9A1/P4HA2/ALDH7A1/SMS/ALDH2/AMD1	8
hsa05144	Malaria	8/331	50/8292	0.00073347	0.0139359	0.0111693	MET/SDC2/SDC1/GYPC/KLRB1/ITGAL/TGFB1/CXCL8	8
hsa04660	T cell receptor signaling pathway	12/331	104/8292	0.000852173	0.0151793	0.0121659	MAPK13/ITK/MAP3K8/ICOS/CD8A/CD247/NFKBIA/CD3G/CD3E/PTPRC/CD3D/FOS	12
hsa04928	Parathyroid hormone synthesis, secretion and action	12/331	106/8292	0.00101032	0.0169378	0.0135752	SLC34A2/EGR1/CREB3L2/RXRG/PDE4B/NR4A2/MEF2C/SLC9A3R1/BCL2/PRKACB/CDKN1A/FOS	12
hsa05202	Transcriptional misregulation in cancer	17/331	193/8292	0.00178979	0.0283384	0.0227126	PAX8/DUSP6/MET/NUPR1/SPINT1/HMGA2/CCND2/ETV1/RXRG/SPI1/MEF2C/PLAU/CDKN1A/ATM/GADD45B/CXCL8/BAX	17
hsa05210	Colorectal cancer	10/331	86/8292	0.00214034	0.0311036	0.0249288	CCND1/AREG/TGFB1/CYCS/BCL2/CDKN1A/GADD45B/PMAIP1/BAX/FOS	10
hsa05130	Pathogenic Escherichia coli infection	17/331	197/8292	0.00222894	0.0311036	0.0249288	CLDN7/CLDN1/CLDN16/MYH10/MYO6/MAPK13/PYCARD/FCGR2A/TUBA4A/TUBA1A/NFKBIA/TNFSF10/SLC9A3R1/CYCS/CXCL8/BAX/FOS	17
hsa04142	Lysosome	13/331	132/8292	0.00229184	0.0311036	0.0249288	NPC2/CTSB/ASAH1/CTSH/NAPSA/CD63/CLTA/SLC17A5/CLN5/IGF2R/AP1S1/CTSS/CTSA	13
hsa04064	NF-kappa B signaling pathway	11/331	104/8292	0.00280378	0.0363217	0.0291111	TNFSF13B/NFKBIA/TNFAIP3/CCL4L2/CCL4/PLAU/BCL2/ATM/GADD45B/CYLD/CXCL8	11
hsa05216	Thyroid cancer	6/331	37/8292	0.00315277	0.037008	0.0296611	PAX8/CCND1/RXRG/CDKN1A/GADD45B/BAX	6
hsa04141	Protein processing in endoplasmic reticulum	15/331	171/8292	0.00340364	0.037008	0.0296611	CRYAB/HSP90B1/HSPA5/PDIA6/CANX/TUSC3/CALR/SEC62/RAD23B/DNAJC3/BCL2/PPP1R15A/HERPUD1/BAX/DNAJB1	15
hsa05162	Measles	13/331	139/8292	0.00360838	0.037008	0.0296611	CCND1/CCND2/NFKBIA/CD3G/TNFAIP3/CD3E/CD3D/CYCS/BCL2/CCND3/BAX/FOS/MSN	13
hsa05418	Fluid shear stress and atherosclerosis	13/331	139/8292	0.00360838	0.037008	0.0296611	CAV1/SDC4/HSP90B1/SDC2/VEGFA/GSTM3/SDC1/MAPK13/KLF2/MEF2C/BCL2/DUSP1/FOS	13
hsa05340	Primary immunodeficiency	6/331	38/8292	0.00362078	0.037008	0.0296611	ICOS/CD8A/CD3E/IL7R/PTPRC/CD3D	6
hsa04218	Cellular senescence	14/331	156/8292	0.0037444	0.037008	0.0296611	CCND1/ZFP36L1/RRAS/MAPK13/CCND2/HLA-B/ZFP36L2/TGFB1/EIF4EBP1/CDKN1A/ATM/CCND3/GADD45B/CXCL8	14
hsa04659	Th17 cell differentiation	11/331	108/8292	0.00376573	0.037008	0.0296611	MAPK13/RXRG/CD247/NFKBIA/CD3G/HLA-DQB1/CD3E/CD3D/TGFB1/RORA/FOS	11
hsa04380	Osteoclast differentiation	12/331	128/8292	0.00498573	0.0473645	0.0379616	MAPK13/SOCS3/FCGR2A/SPI1/JUNB/NFKBIA/FCGR3A/TYROBP/TGFB1/CYLD/FOSB/FOS	12
